# Supplementary material
Source: Springer Nature journal article supplement (https://www.springermedizin.de/resource/supplementary/12872_2013_702_MOESM1_ESM.pdf/9430700)

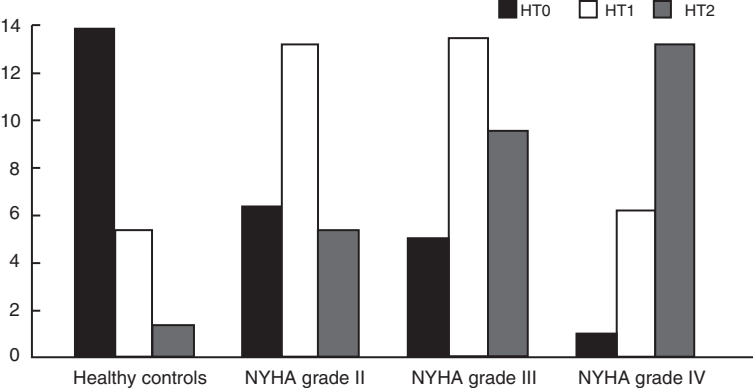

Supplement: MOESM1 [file 9430700]
